# Supplementary material
Source: Research Square preprint supplement (doi:10.21203/rs.3.rs-7179653/v1)
Supplement: Supplementary file 1 [file 9a7a4723dd374008688a2151.pdf]

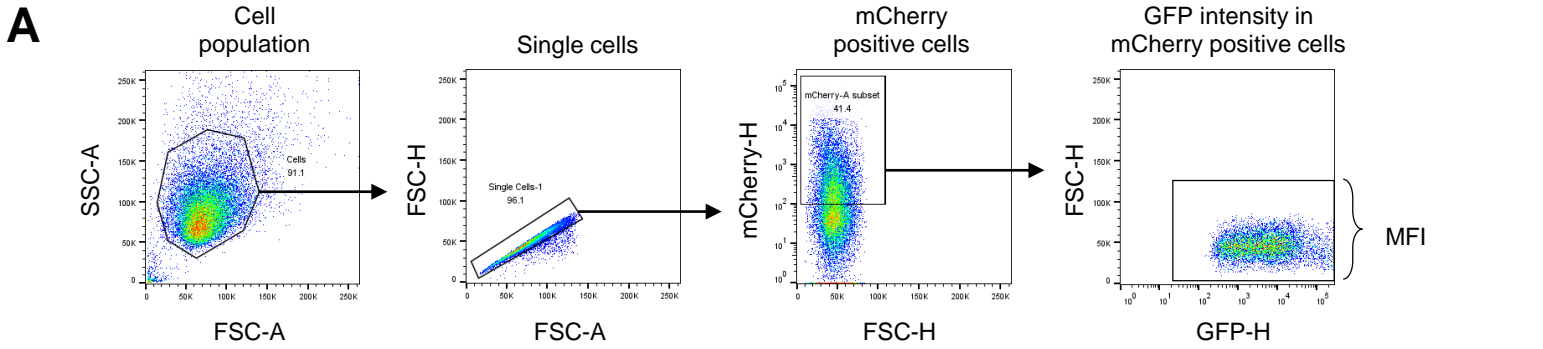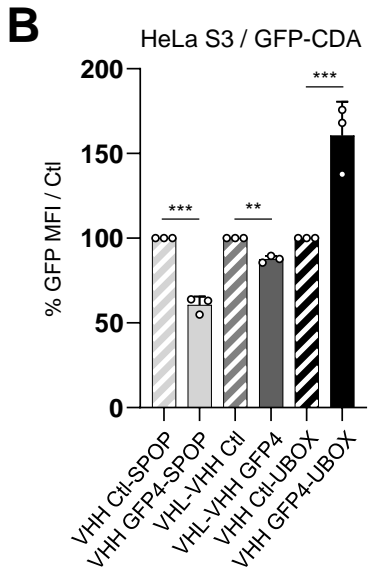

**C**

|              |     |    |    |     |     |    |    |    |     |     |     |     |     |    |       |
|--------------|-----|----|----|-----|-----|----|----|----|-----|-----|-----|-----|-----|----|-------|
| # clone      | 163 | 12 | 78 | 177 | 192 | 21 | 39 | 73 | 118 | 125 | 148 | 168 | 174 | 13 | Total |
| # repetition | 10  | 6  | 2  | 2   | 2   | 1  | 1  | 1  | 1   | 1   | 1   | 1   | 1   | 1  | 30    |

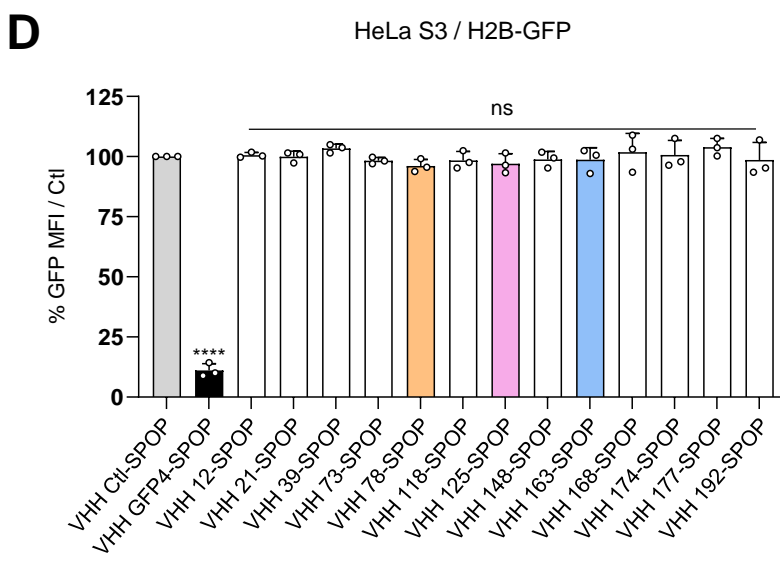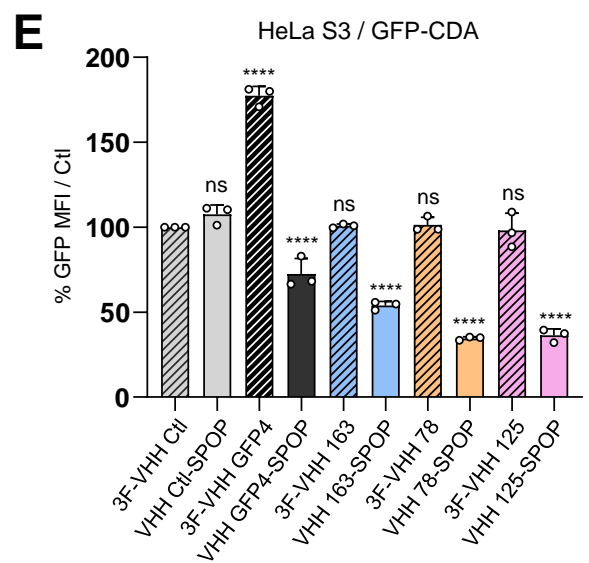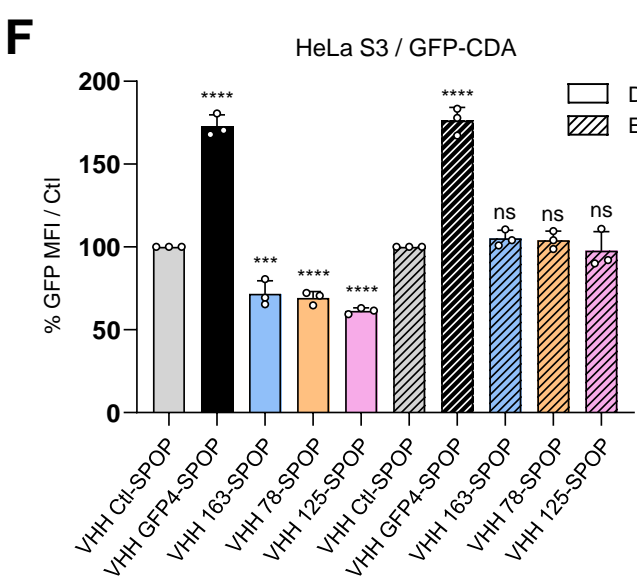

Supplementary Figure 1: Characterisation of the positive hits from the cell-based screening.

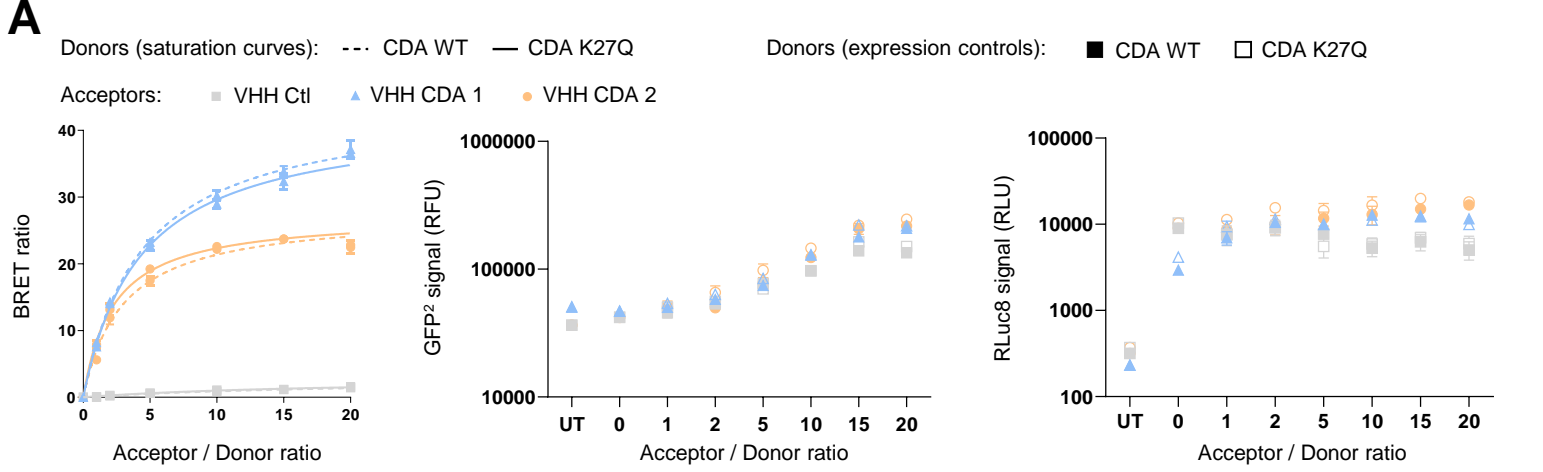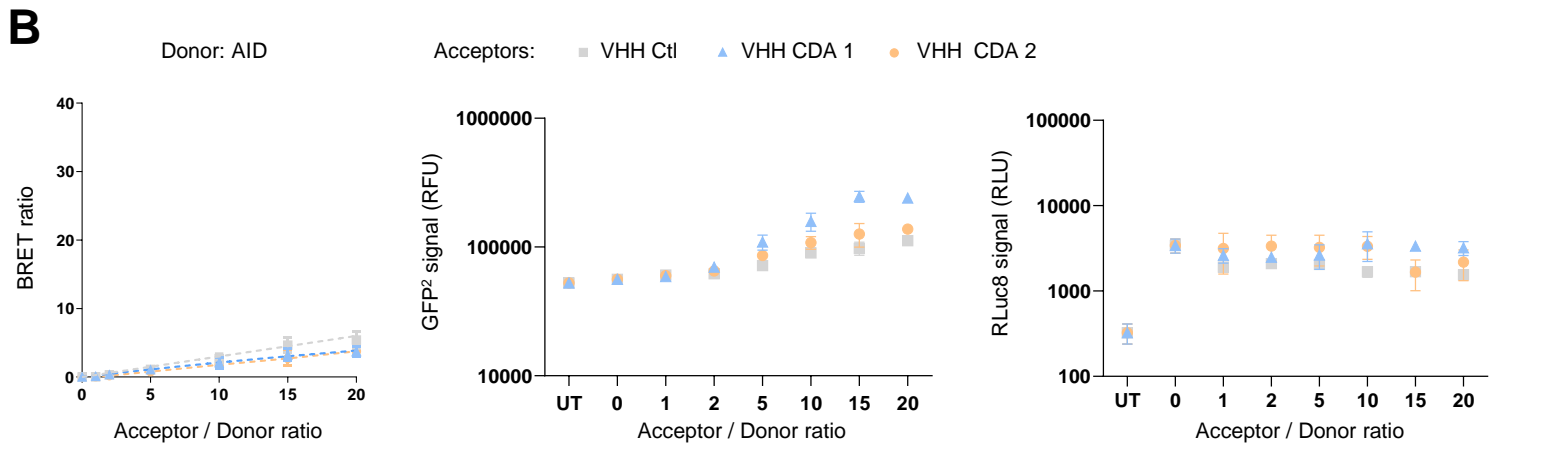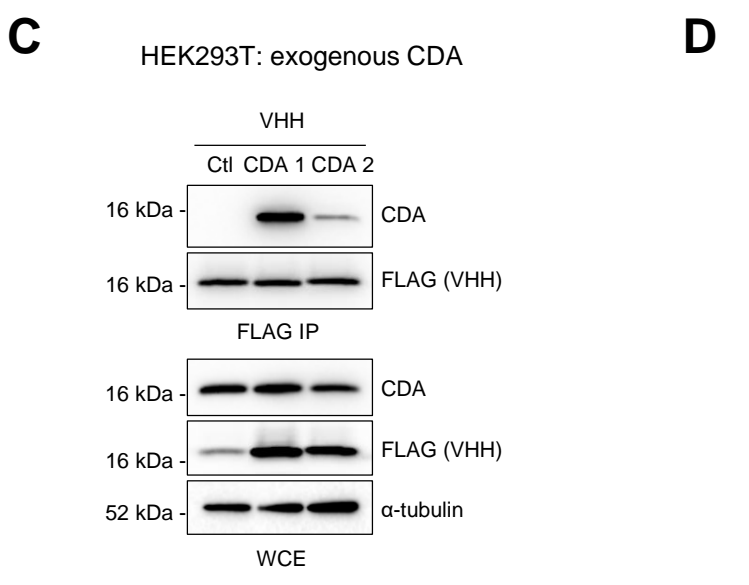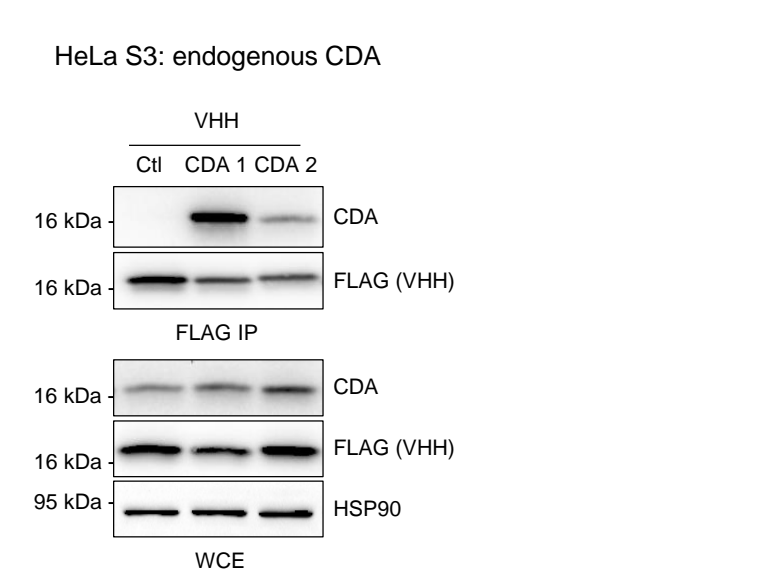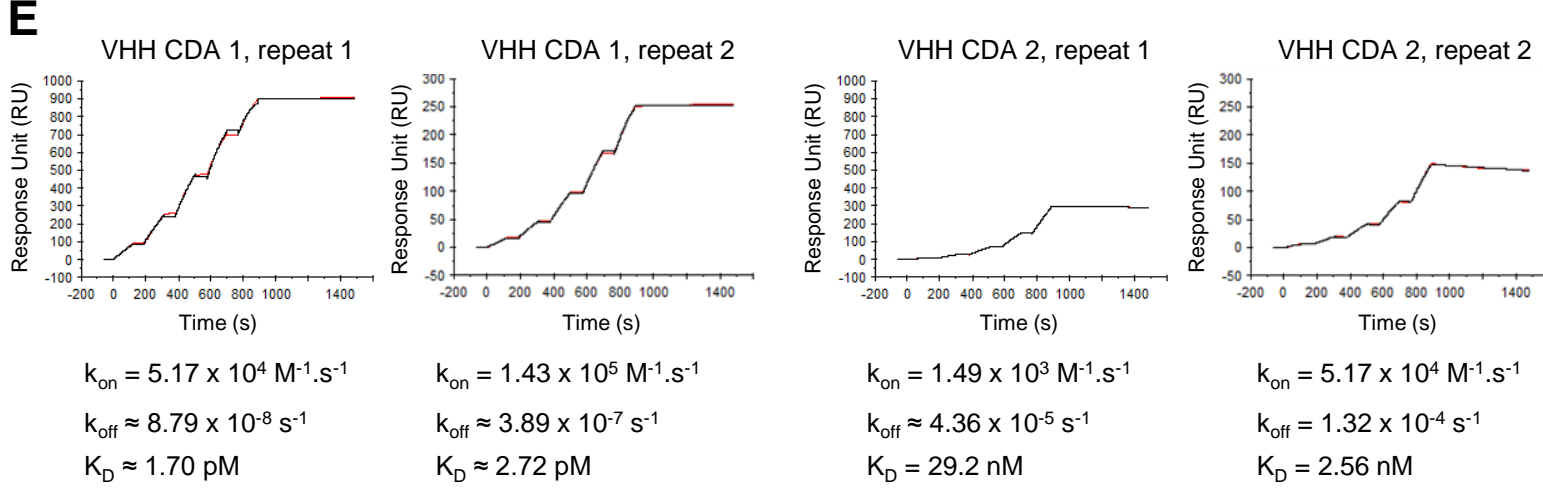

Supplementary Figure 2: Characterisation of anti-CDA VHs.

**A**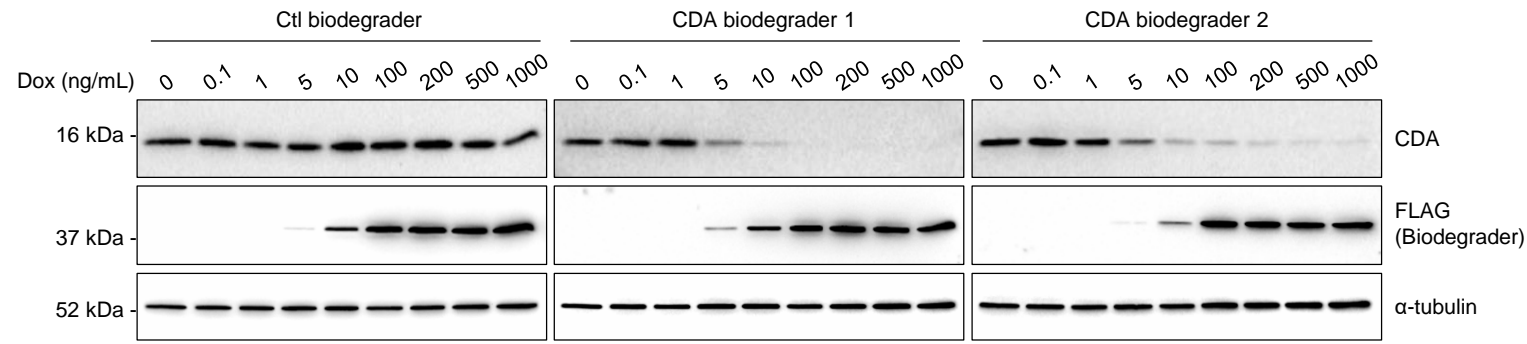**B**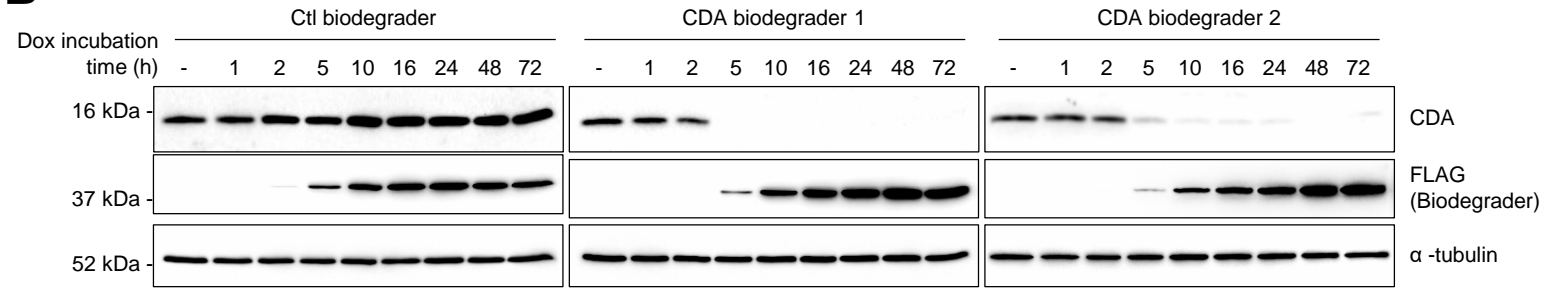**C**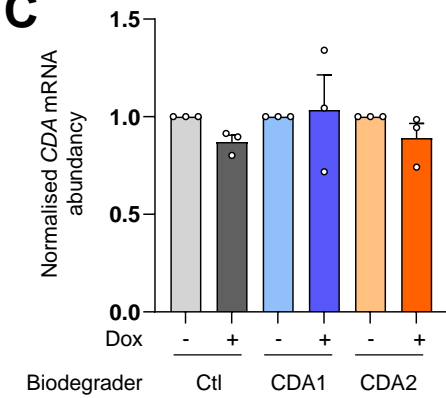**D**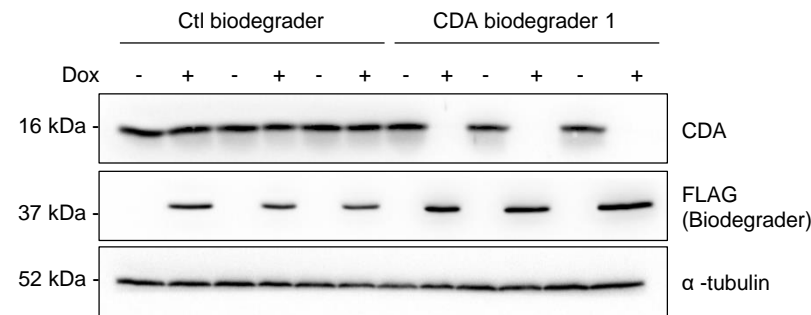**E**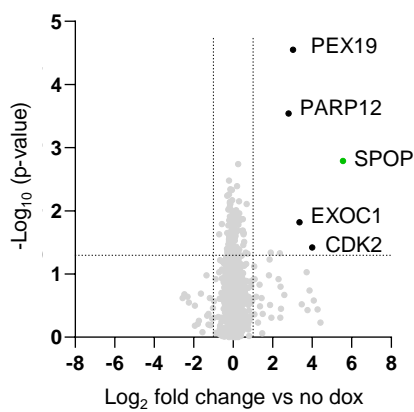

**Supplementary Figure 3: Characterisation of CDA biodegraders in AsPC-1 pancreatic cancer cells.**

**A**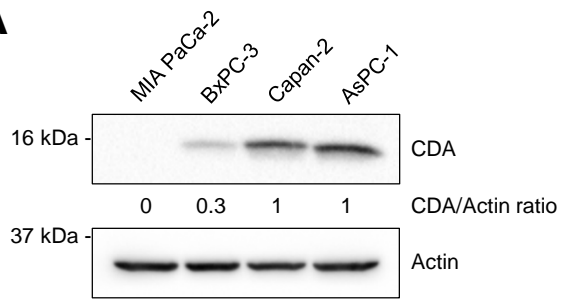**B**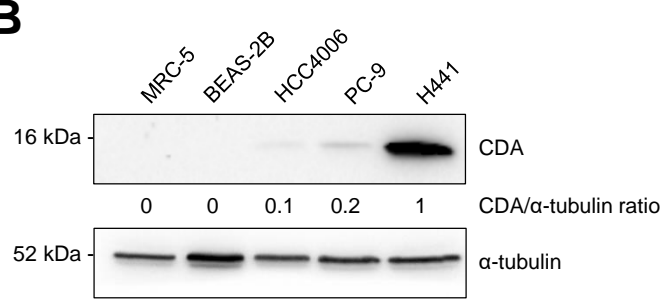**C**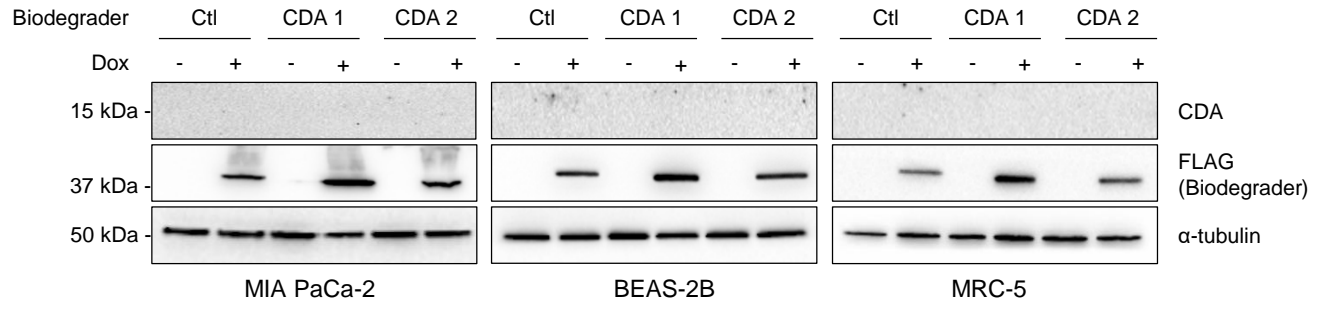

**Supplementary Figure 4: CDA biodegraders effect on cells that do not express CDA.**

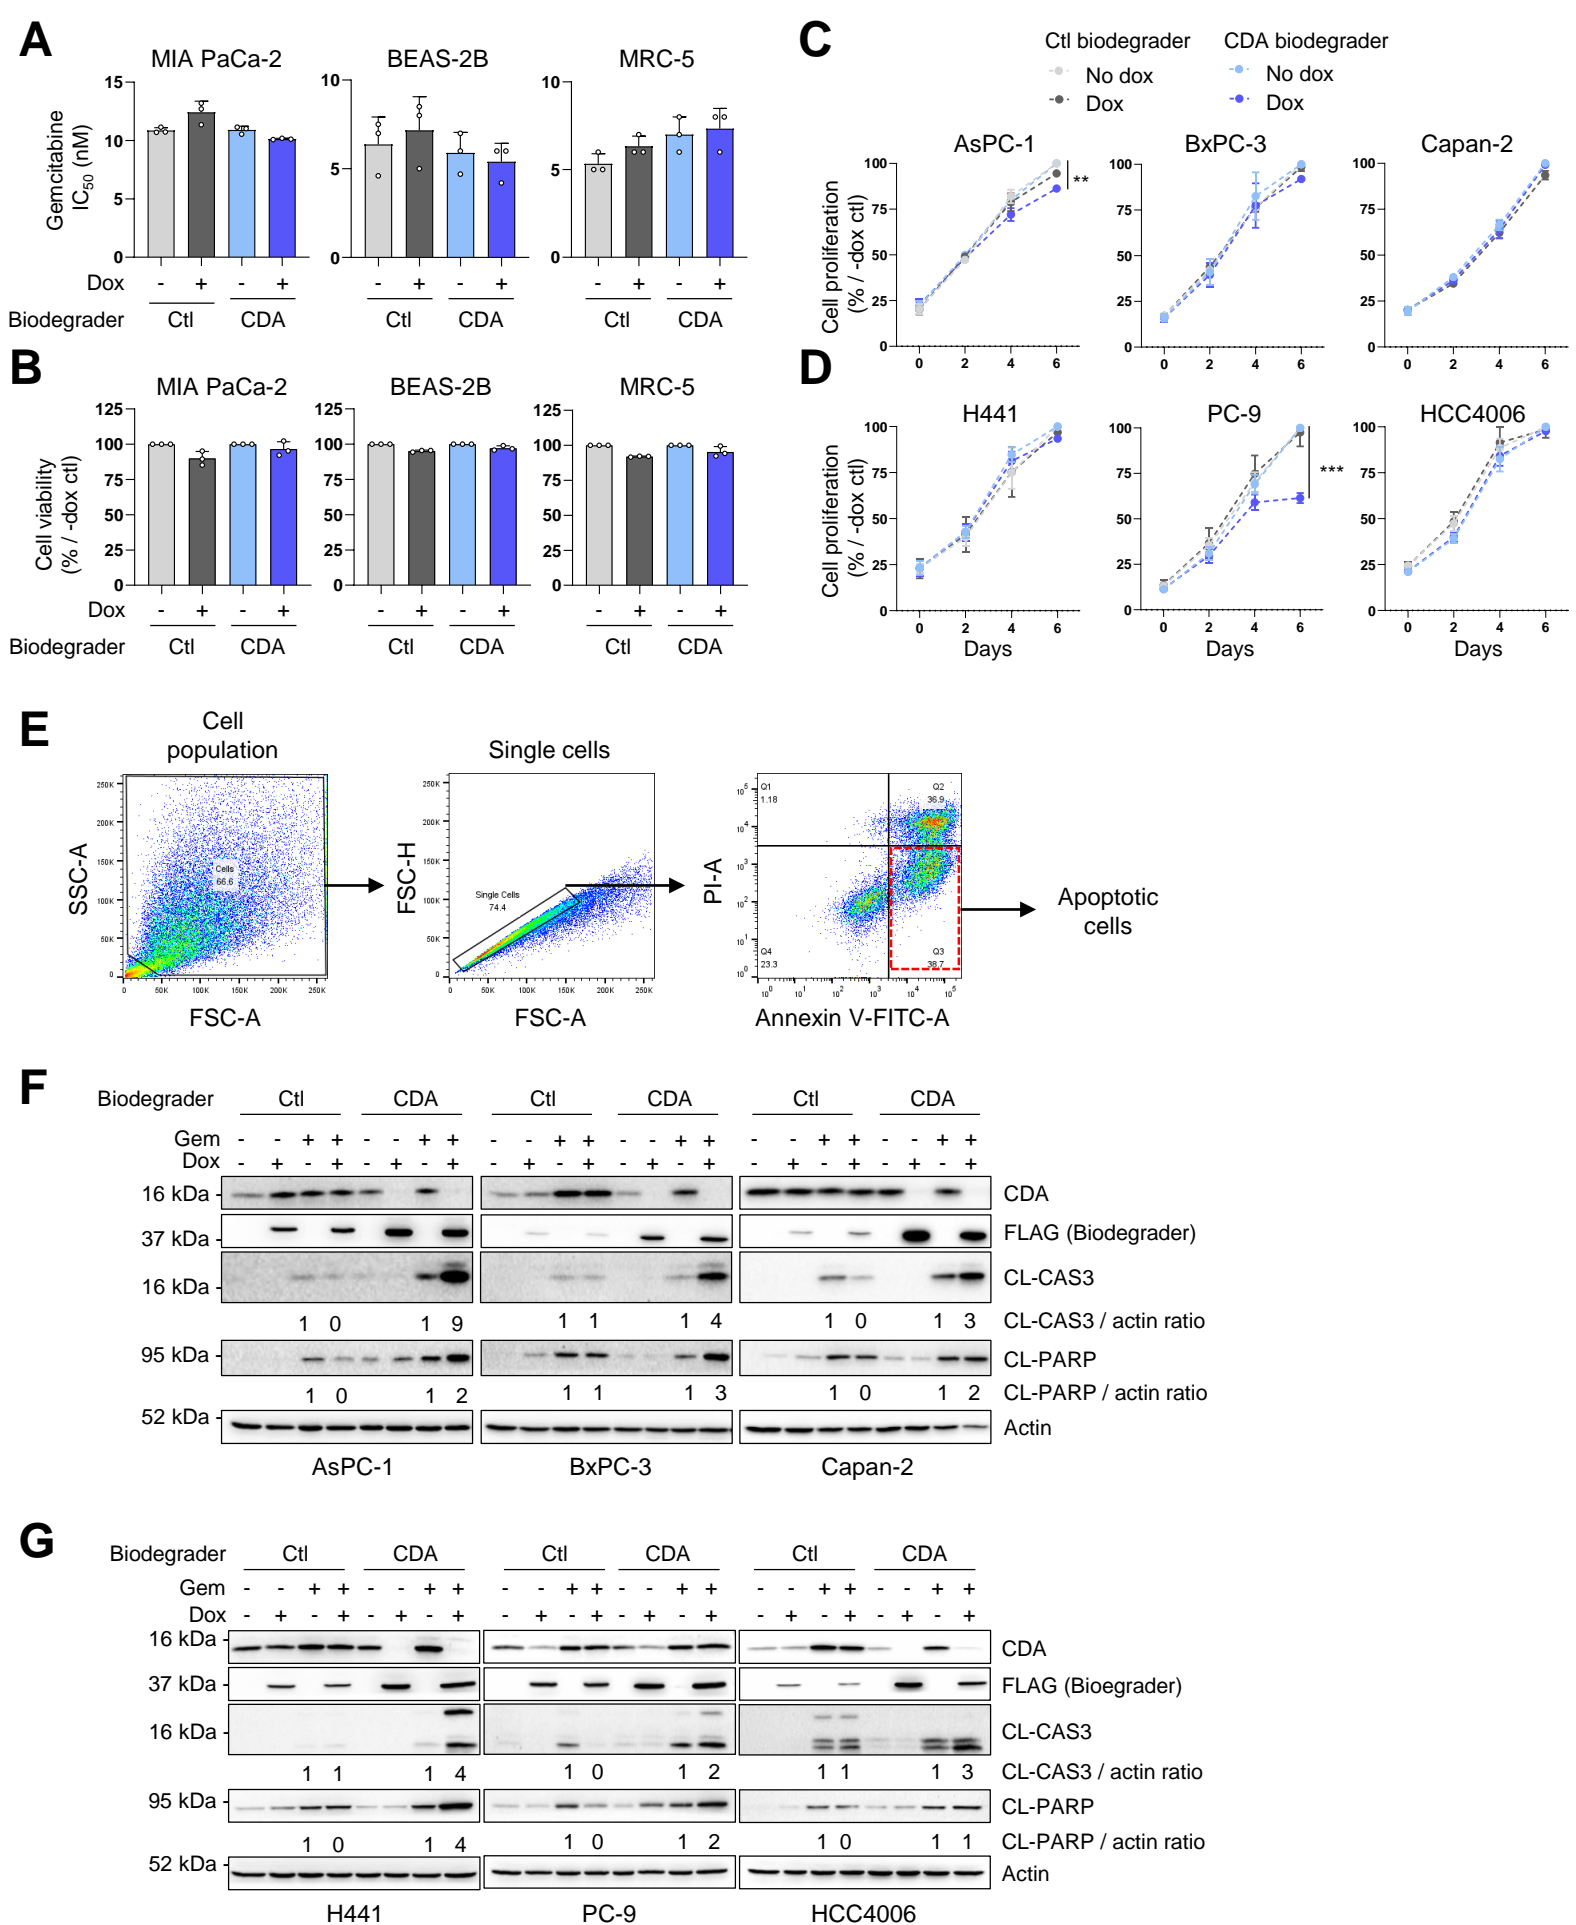

Supplementary Figure 5: Characterisation of CDA biodegrader effect on cell proliferation and apoptosis

**A**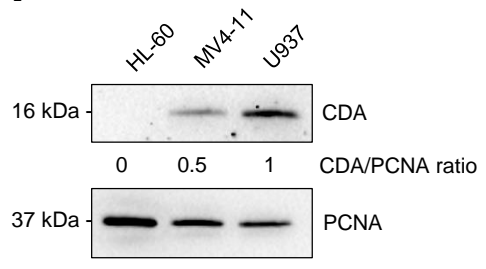**B**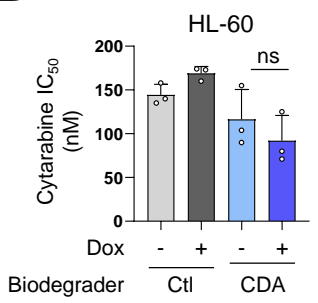**C**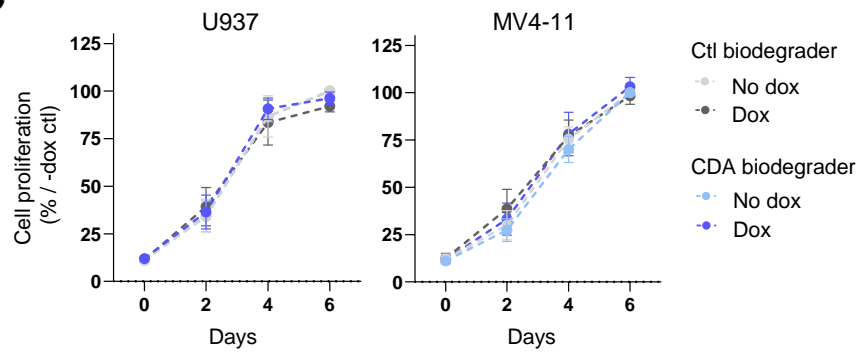**D**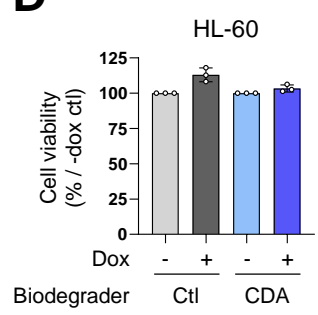**E**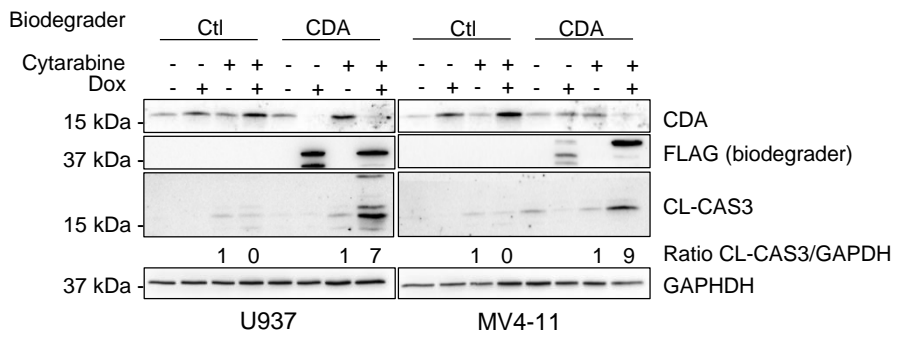

Supplementary Figure 6: Characterisation of CDA biodegrader in AML cells

**A**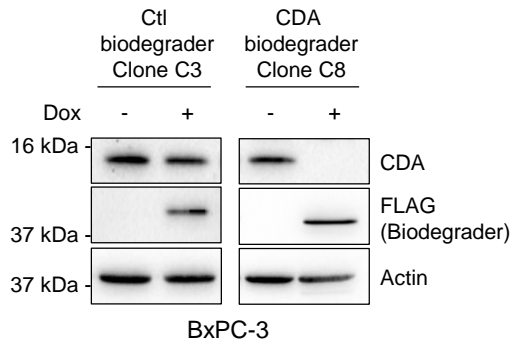**B**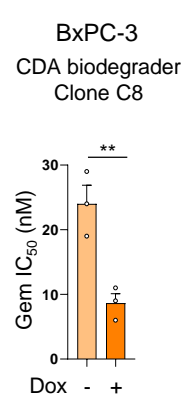**C**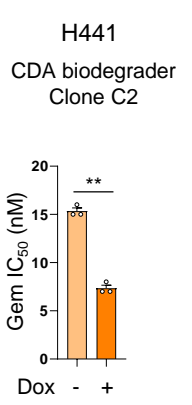**D**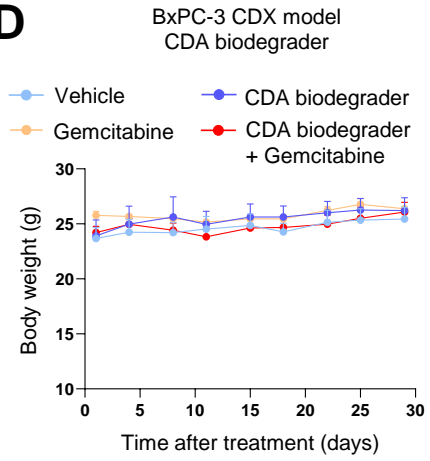**E**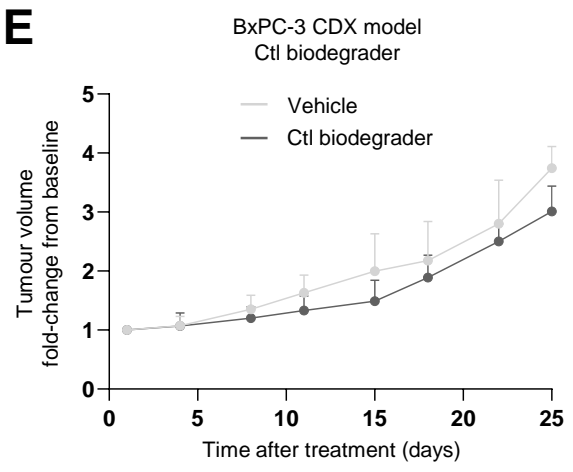**F**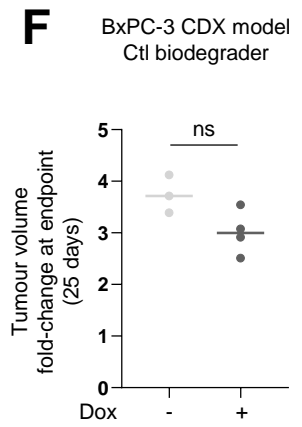**G**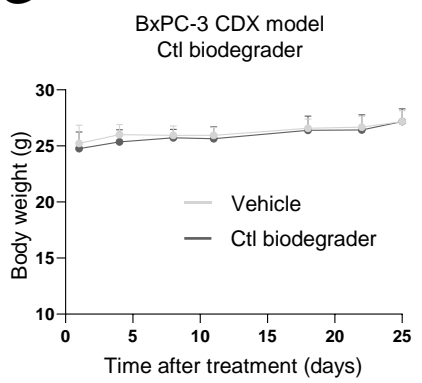**H**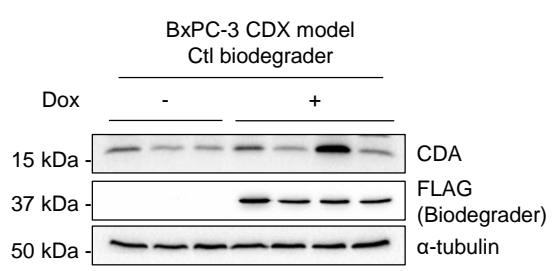**I**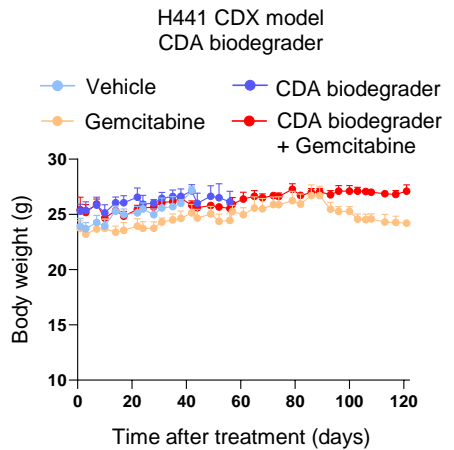

**Supplementary Figure 7: Characterisation of BxPC-3 and H441 clones and effect of the Ctl biodegrader on tumour growth.**

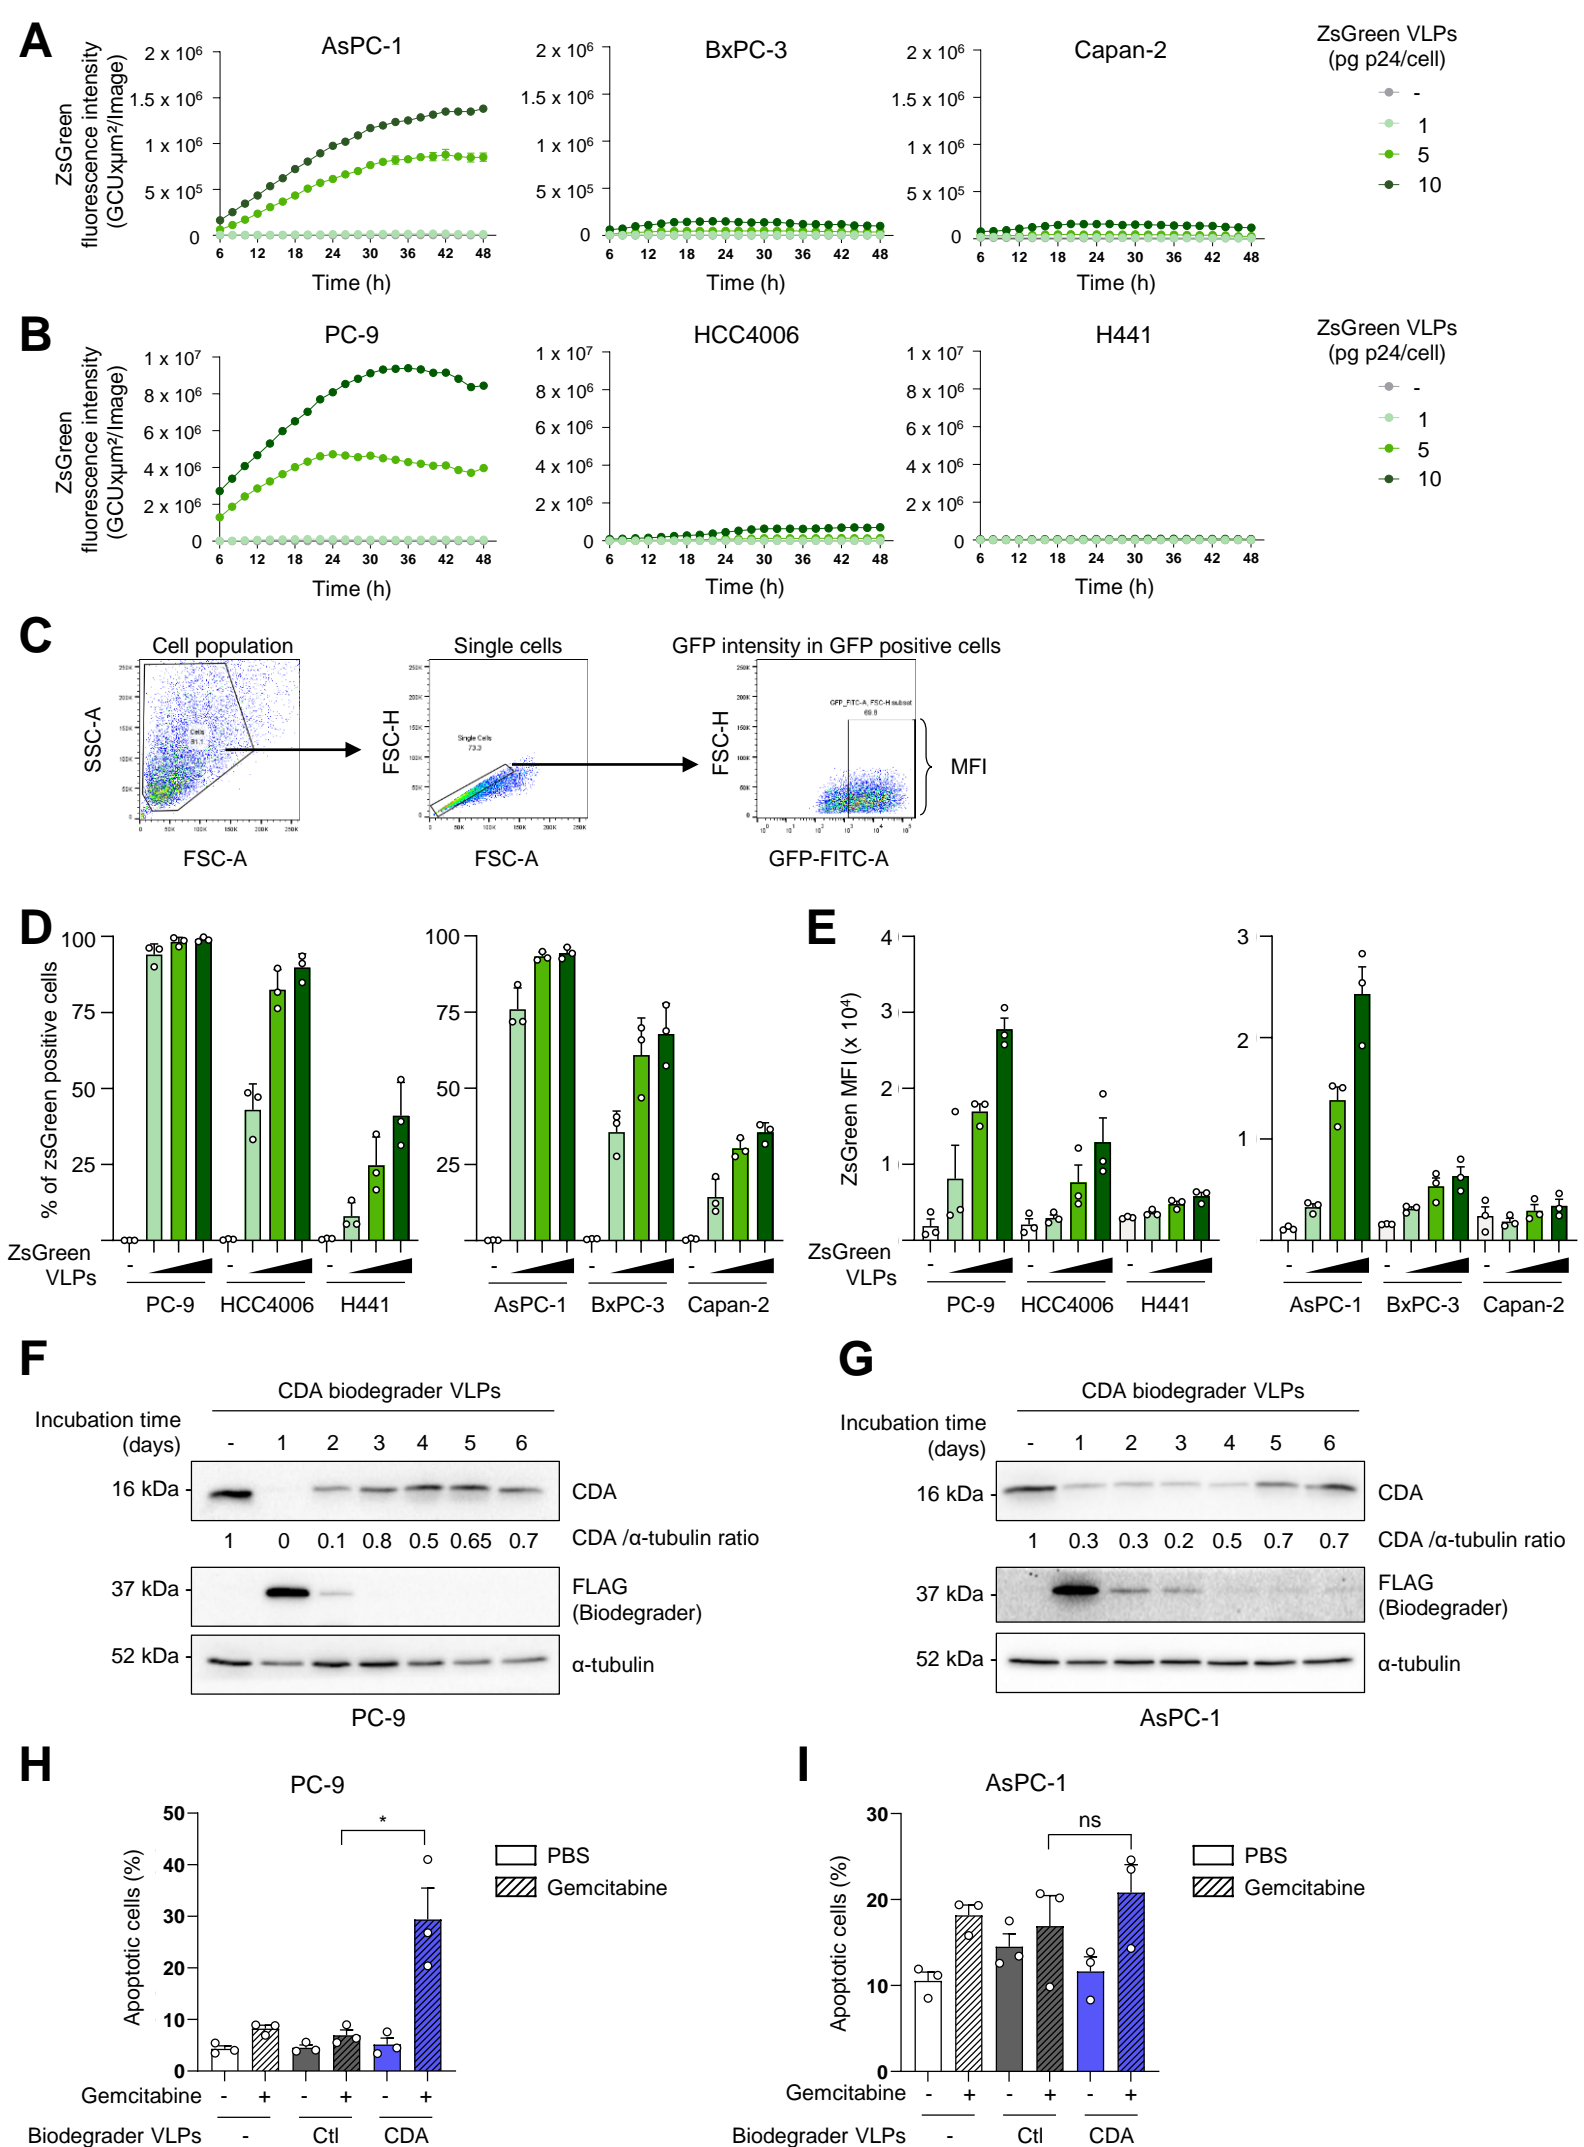

**Supplementary figure 8: *In vitro* characterisation of CDA biodegrader mRNA delivery via VLPs in pancreatic and lung cancer cell lines.**

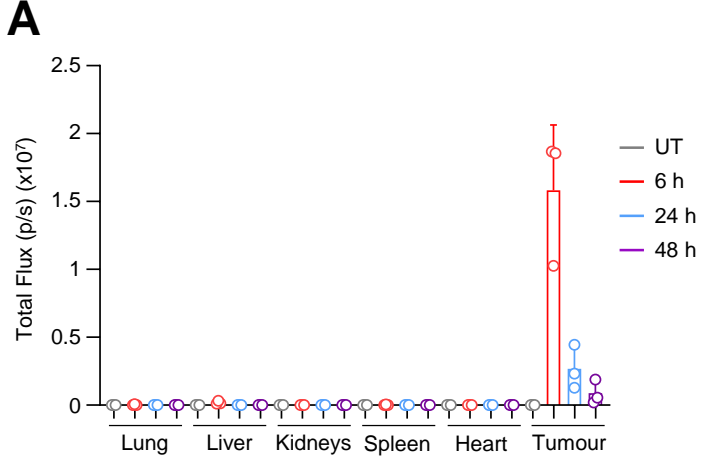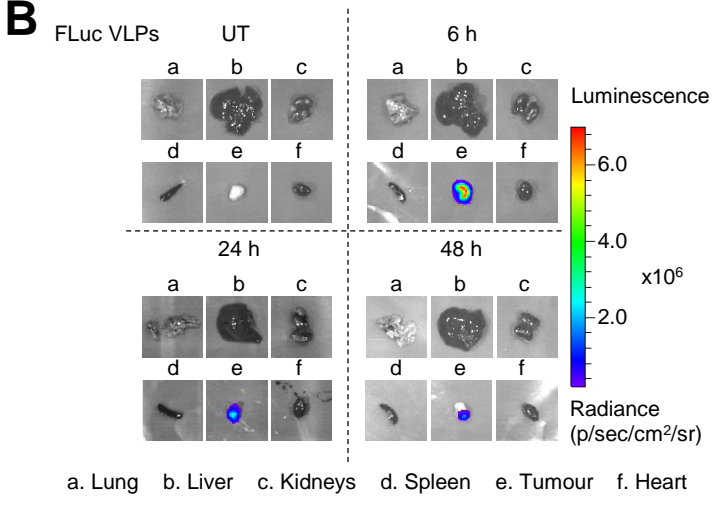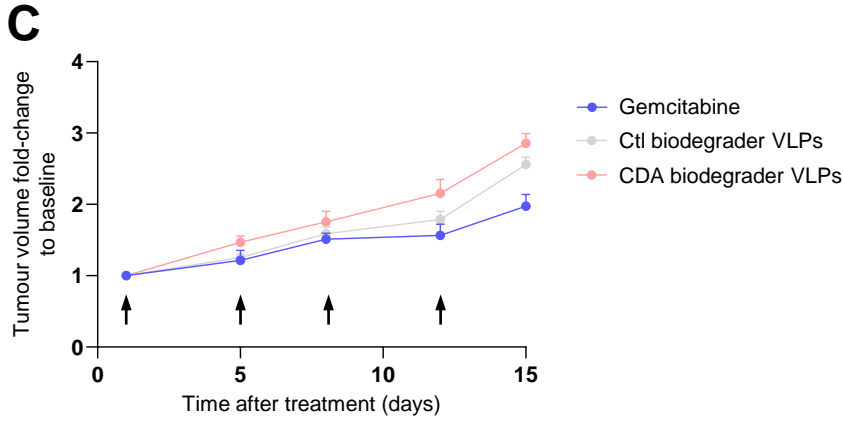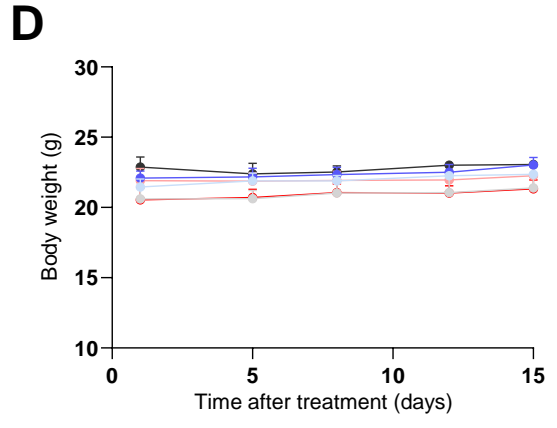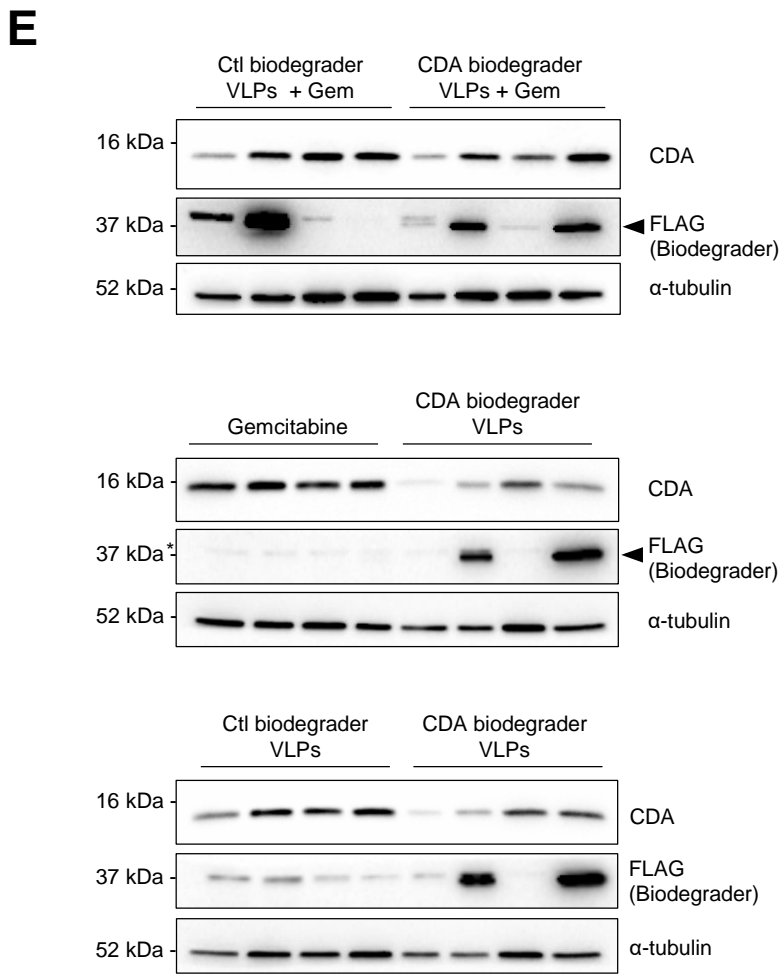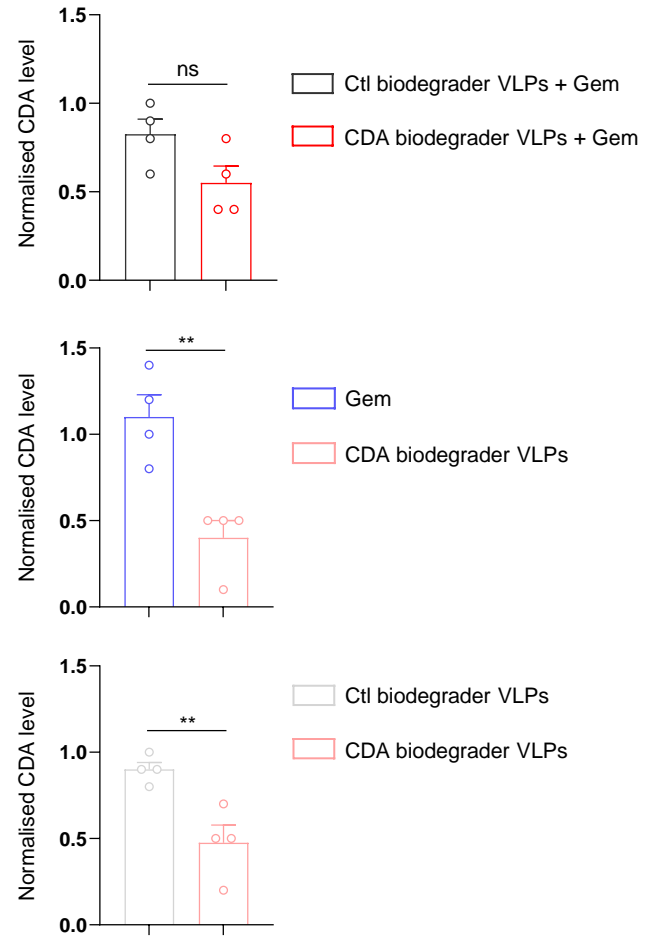

**Supplementary figure 9: *In vivo* characterisation of CDA biodegrader mRNA delivery via VLPs in a lung CDX model.**
